# Supplementary material for: In situ fabrication of cobalt sulfide-decorated N,S co-doped mesoporous carbon and its application as an electrocatalyst for efficient oxygen reduction reaction
Source: Royal Society of Chemistry journal article supplement (doi:10.1039/d2nj00403h), 2022-01-01
Supplement: d2nj00403h1.pdf [file d2nj00403h1.pdf]

## *Supporting Information*

### **In-situ fabrication of cobalt sulfide decorated N, S co-doped mesoporous carbon and its application as electrocatalyst for efficient oxygen reduction reaction**

**V. Parthiban<sup>a,b</sup>, P. V. Sruthibhai<sup>a</sup>, Rahul S. Menon<sup>a,b</sup>, Subhendu K Panda<sup>b,c</sup>, and A. K. Sahu<sup>\*,a,b</sup>**

<sup>a</sup>CSIR - Central Electrochemical Research Institute-Madras Unit, CSIR Madras Complex, Taramani, Chennai 600113, India.

<sup>b</sup>Academy of Scientific and Innovative Research (AcSIR), Ghaziabad- 201002, India.

<sup>c</sup>EMF Division, CSIR - Central Electrochemical Research Institute, Karaikudi-630003, India

**\*Corresponding author.** E-mail: aksahu@cecri.res.in, akhilakumar2008@gmail.com.

Phone: +91-44-22544554

#### **Content**

**Fig. S1** BET Nitrogen adsorption-desorption isotherm of (a) MC, (b) Co<sub>9</sub>S<sub>8</sub>/N,S-MC-0.5, and (c) Co<sub>9</sub>S<sub>8</sub>/N,S-MC-1.5 catalysts. Inset images of each figure shows the corresponding pore size distribution analysis.

**Table S1.** Elemental composition obtained from the EDAX analysis of the Co<sub>9</sub>S<sub>8</sub>/N,S-MC-0.5 Co<sub>9</sub>S<sub>8</sub>/N,S-MC-1.0 and Co<sub>9</sub>S<sub>8</sub>/N,S-MC-1.5 catalyst

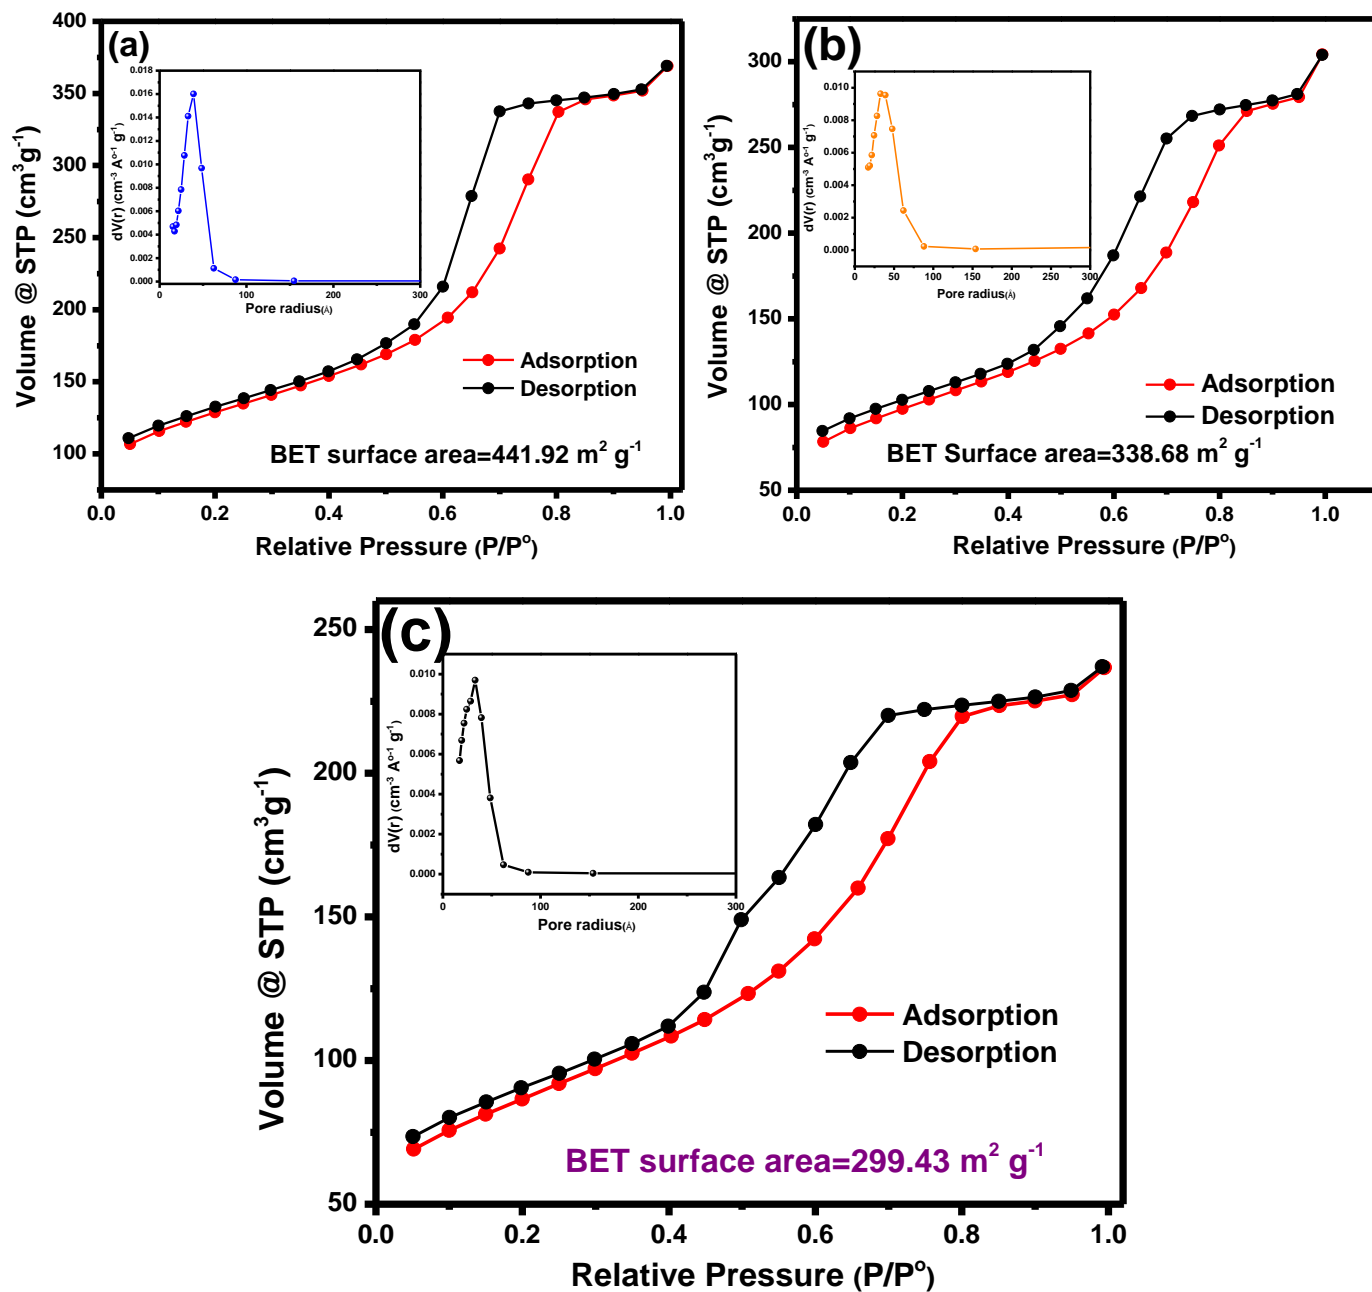

**Fig. S1** BET Nitrogen adsorption-desorption isotherm of (a) MC, (b)  $\text{Co}_9\text{S}_8/\text{N,S-MC-0.5}$ , and (c)  $\text{Co}_9\text{S}_8/\text{N,S-MC-1.5}$  catalysts. Inset images of each figure shows the corresponding pore size distribution analysis.

**Table S1.** Elemental composition obtained from the EDAX analysis of the Co<sub>9</sub>S<sub>8</sub>/N,S-MC-0.5 Co<sub>9</sub>S<sub>8</sub>/N,S-MC-1.0 and Co<sub>9</sub>S<sub>8</sub>/N,S-MC-1.5 catalyst

| <b>Catalyst</b>                            | <b>Co ( At.%)</b> | <b>S (At.%)</b> | <b>N (At.%)</b> | <b>C (At.%)</b> | <b>O (At.%)</b> |
|--------------------------------------------|-------------------|-----------------|-----------------|-----------------|-----------------|
| Co <sub>9</sub> S <sub>8</sub> /N,S-MC-0.5 | 0.01              | 0.15            | 0.58            | 95.86           | 3.40            |
| Co <sub>9</sub> S <sub>8</sub> /N,S-MC-1.0 | 0.03              | 0.23            | 5.39            | 90.88           | 3.47            |
| Co <sub>9</sub> S <sub>8</sub> /N,S-MC-1.5 | 0.14              | 0.69            | 3.46            | 92.23           | 3.48            |
